# Supplementary material for: Metabolic profile in endothelial cells of chronic thromboembolic pulmonary hypertension and pulmonary arterial hypertension
Source: PubMed Central journal article supplement (PMC8831561; doi:10.1038/s41598-022-06238-z), 2022-02-10
Supplement: 41598_2022_6238_MOESM1_ESM.pdf [file 41598_2022_6238_MOESM1_ESM.pdf]

## Supplementary Material

### Metabolic profile in endothelial cells of chronic thromboembolic pulmonary hypertension and pulmonary arterial hypertension.

V.F.E.D. Smolders\*<sup>1,2</sup>, C. Rodríguez\*<sup>1,3</sup>, I. Blanco<sup>1,4</sup>, R. Szulcek<sup>5,6</sup>, Wim Timens<sup>7</sup>, L. Piccari<sup>1</sup>, Y. Roger<sup>1</sup>, X. Hu<sup>1</sup>, Constanza Morén<sup>8,9</sup>, C. Bonjoch<sup>1</sup>, L. Sebastián<sup>1</sup>, M. Castellà<sup>10</sup>, J. Osorio<sup>1,4</sup>, V. I. Peinado<sup>1,4</sup>, Harm Jan Bogaard<sup>11</sup>, P. H. A. Quax<sup>2</sup>, M. Cascante<sup>12,13+</sup>, J.A. Barberà<sup>1,4+</sup>, O. Tura-Ceide<sup>1,3,4+</sup>.

<sup>1</sup> Department of Pulmonary Medicine, Hospital Clínic-Institut d'Investigacions Biomèdiques August Pi i Sunyer (IDIBAPS); University of Barcelona; Barcelona, Spain. <sup>2</sup> Department of Surgery, Leiden University Medical Center, Leiden, The Netherlands. <sup>3</sup> Biomedical Research Institute-IDIBGI, Girona, Spain. <sup>4</sup> Centro de Investigación Biomédica en Red (CIBER) de Enfermedades Respiratorias, Madrid, Spain. <sup>5</sup> Laboratory of in vitro modeling systems of pulmonary diseases, Institute of Physiology, Charité – Universitätsmedizin Berlin, corporate member of Freie Universität Berlin and Humboldt-Universität zu Berlin, Charitéplatz, Berlin, Germany. <sup>6</sup> German Heart Center Berlin, Berlin, Germany. <sup>7</sup> University of Groningen, University Medical Center Groningen, Dept. of Pathology and Medical Biology, Groningen, the Netherlands <sup>8</sup> Laboratory of Muscle Research and Mitochondrial Function, Institut d'Investigacions Biomèdiques August Pi i Sunyer (IDIBAPS), University of Barcelona (UB), Department of Internal Medicine, Hospital Clínic of Barcelona (HCB), Barcelona, Spain. <sup>9</sup> Biomedical Research Networking Centre on Rare Diseases (CIBERER), Madrid, Spain. <sup>10</sup> Department of Cardiovascular Surgery, Institut Clínic Cardiovascular, Hospital Clínic, Barcelona, Spain. <sup>11</sup> Amsterdam UMC, VU University Medical Center (VUmc), Dept. of Pulmonary Diseases, Amsterdam Cardiovascular Sciences (ACS), Amsterdam, the Netherlands. <sup>12</sup> Department of Biochemistry and Molecular Biomedicine and Institute of Biomedicine (IBUB), Faculty of Biology, Universitat de Barcelona, Diagonal 643, 08028 Barcelona, Spain. <sup>13</sup> CIBER of Hepatic and Digestive Diseases (CIBEREHD), Institute of Health Carlos III (ISCIII), 28029 Madrid, Spain.

\*Both authors have contributed equally

+Correspondence: [olgaturac@gmail.com](mailto:olgaturac@gmail.com), [martacascante@ub.edu](mailto:martacascante@ub.edu) and [jbarbera@clinic.cat](mailto:jbarbera@clinic.cat)

Servei de Pneumologia, Hospital Clínic. Villarroel, 170. Barcelona 08036. Spain. Phone 34-93-227-5747; Fax. 34-93-227-5455.

**Running title:** Metabolic profile in pulmonary hypertension.

**Table of contents:** Supplementary Tables and figures.

**Supplementary table 1.** Primers used in this manuscript

| Gene name     | Forward (5'-3')          | Reverse (5'-3')          |
|---------------|--------------------------|--------------------------|
| <b>G6PD</b>   | CCAAGCCCATCCCCTATATTT    | CCACTTGTAGGTGCCCTCAT     |
| <b>GLS1</b>   | GCTGTGCTCCATTGAAGTGACT   | TTGGGCAGAAACCACCATTAG    |
| <b>GLUD1</b>  | GGGATTCTAACTACCACTTGCTCA | AACTCTGCCGTGGGTACAAT     |
| <b>GLUT1</b>  | GGTTGTGCCATACTCATGACC    | CAGATAGGACATCCAGGGTAGC   |
| <b>HK2</b>    | TCCCCTGCCACCAGACTA       | TGGACTTGAATCCCTTGGTC     |
| <b>LDHA</b>   | GCAGATTTGGCAGAGAGTATAATG | GACATCATCCTTTATCCGTAAAGA |
| <b>PDHA1</b>  | CCTGACTTTATATGGCGATGG    | CTGCCATGTTGTAAGCTTCG     |
| <b>PDK1</b>   | GGTTACGGGACAGATGCAGT     | CGTGGTTGGTGTGTAATGC      |
| <b>PFKFB3</b> | CCTACCTGAAATGCCCTCTTC    | GTCCCTTCTTTGCATCCTCTG    |
| <b>HOXD3</b>  | CGTAAGGATTGCATCGGACT     | TCCTAAGCTCGGCTGGATAA     |
| <b>HOXD8</b>  | TAAACCAGCTTGCTGTGTGC     | GTGAGGCTATCGCTTTCCTG     |
| <b>HOXD9</b>  | CCTGCTCCATTGGTTCCTTA     | TCAGAAACATGGGGGACATT     |

**Supplementary table 2.** Antibodies used in this manuscript

| Name                               | Dilution        | Company           | Code      | Characteristics | Host   | Reactivity | kDa            |
|------------------------------------|-----------------|-------------------|-----------|-----------------|--------|------------|----------------|
| <b>HK2</b>                         | 1/800           | santa cruz        | sc-374091 | monoclonal      | mouse  | human      | 100            |
| <b>LDHA</b>                        | 1/800           | santa cruz        | sc-137243 | monoclonal      | mouse  | human      | 35             |
| <b>G6PD</b>                        | 1/10000         | abcam             | ab993     | polyclonal      | rabbit | human      | 59             |
| <b>PDH-E1<math>\alpha</math></b>   | 1/1000          | santa cruz        | sc-377092 | monoclonal      | mouse  | human      | 43             |
| <b>p-PDH-E1<math>\alpha</math></b> | 1<br>$\mu$ g/mL | abcam             | ab92696   | polyclonal      | rabbit | human      | 43             |
| <b>Total OXPHOS<br/>Cocktail</b>   | 1/250           | abcam             | ab110413  | monoclonal      | mouse  | human      | / <sup>a</sup> |
| <b>PDK1</b>                        | 1/2000          | abcam             | ab207450  | monoclonal      | rabbit | human      | 49             |
| <b><math>\beta</math>-actin</b>    | 1/1000          | novus biologicals | NB600-503 | polyclonal      | rabbit | human      | 37             |
| <b>Vinculin</b>                    | 1/10000         | abcam             | ab129002  | monoclonal      | rabbit | human      | 124            |

<sup>a</sup> This kit contains 5 antibodies. The kDa for each antibody is indicated in figure 4.

Full-length gels represented in Figure 3 in order of appearance.

a)

Figure 3A-B

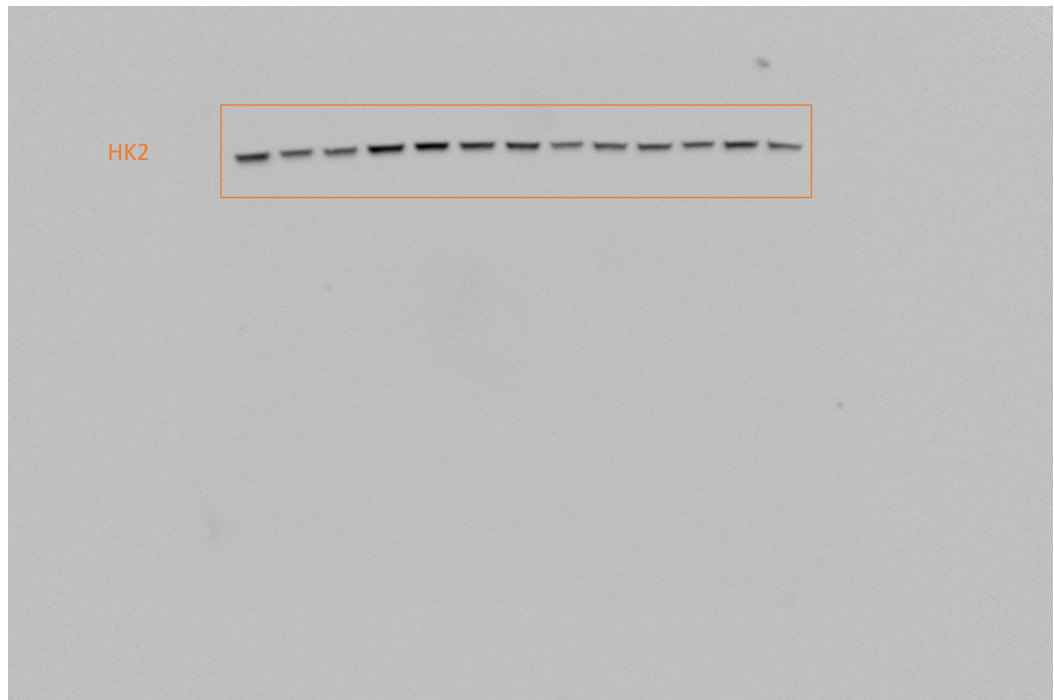

b)

Figure 3A-B

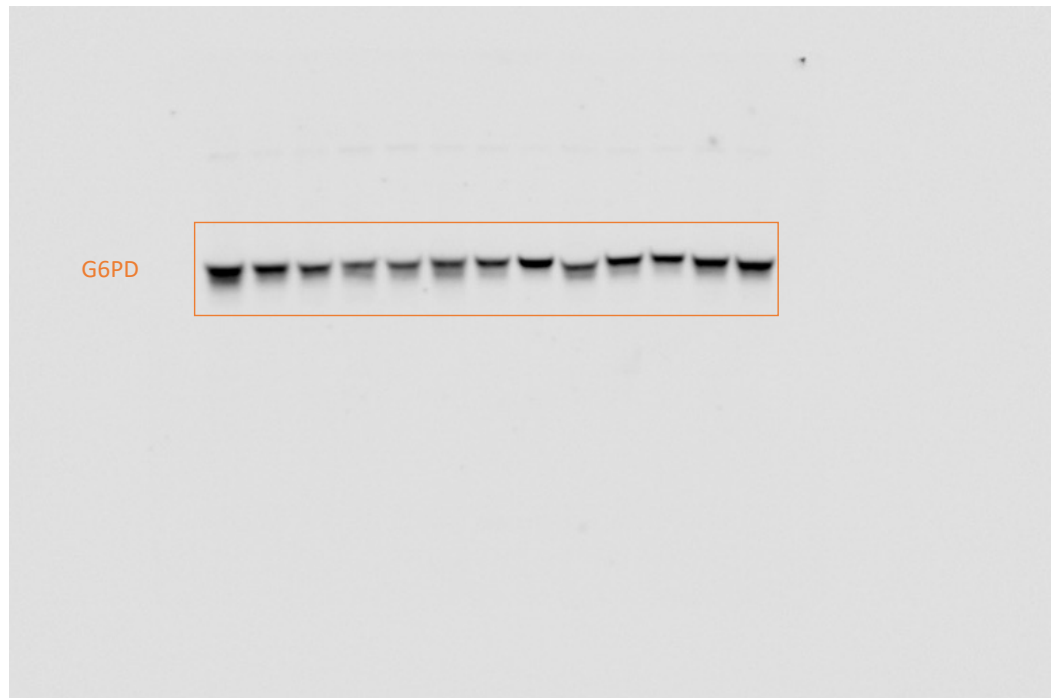

c)

Figure 3A-B

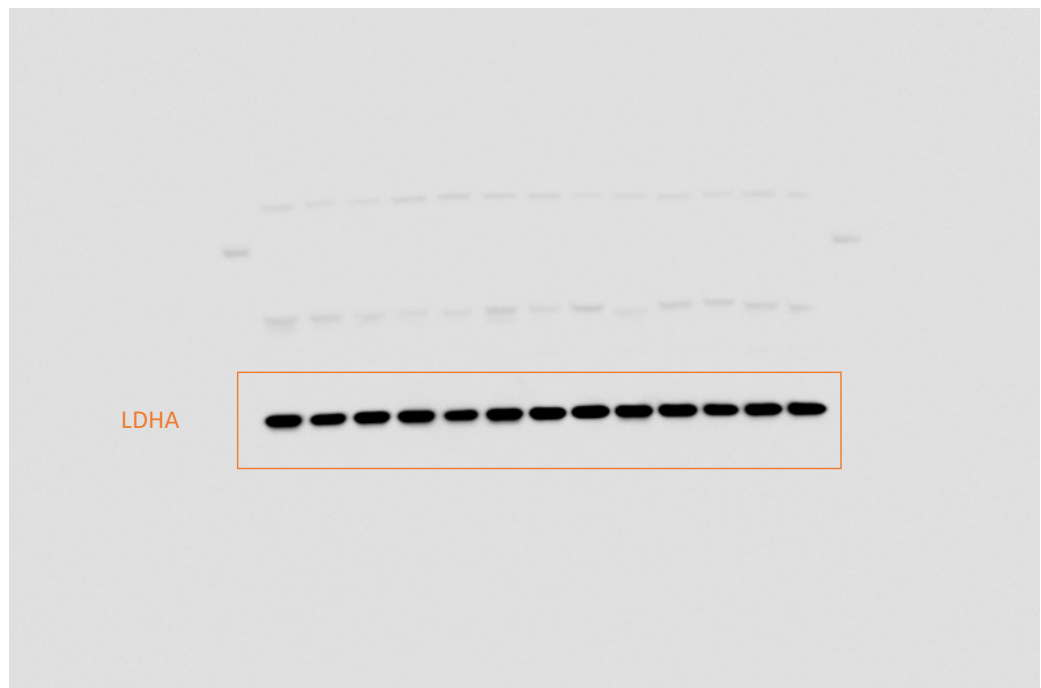

d)

Figure 3A-B

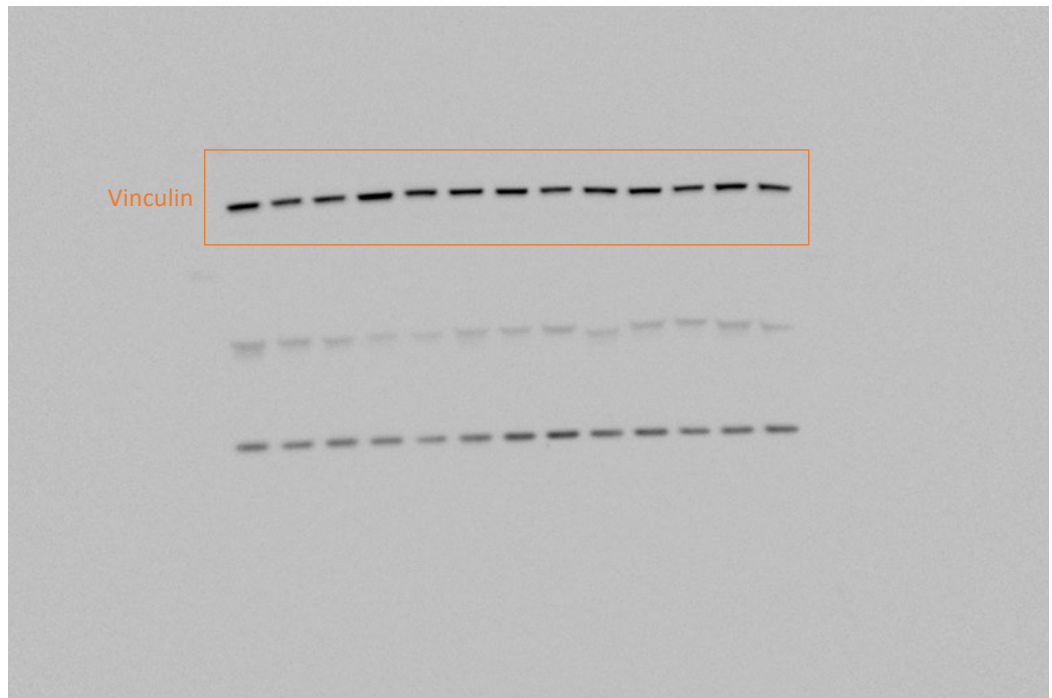

e)

Figure 3C

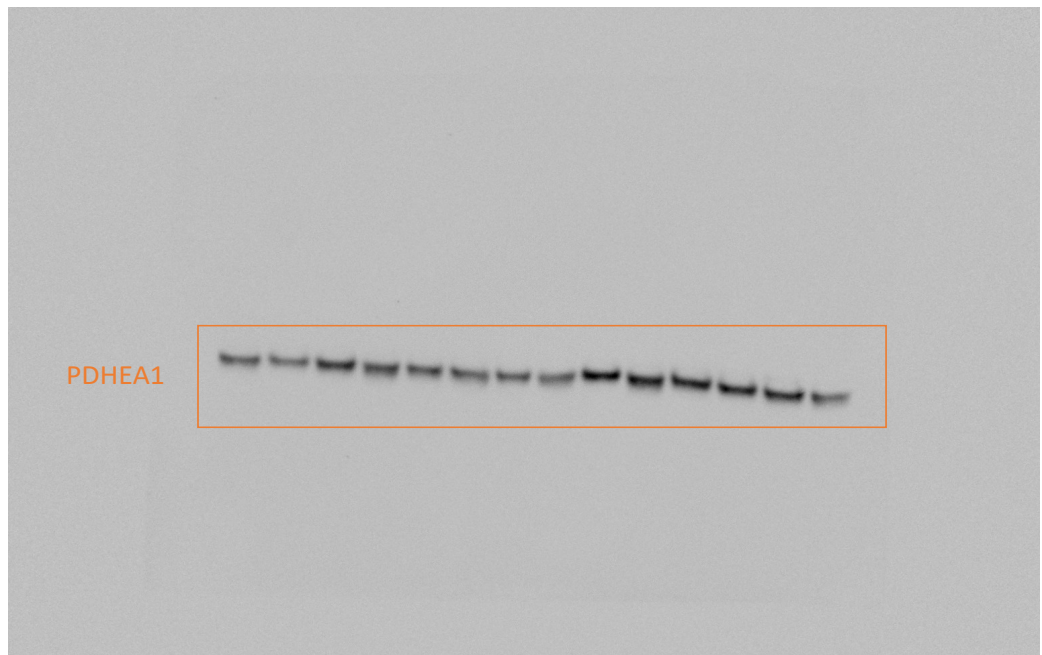

f)

Figure 3C

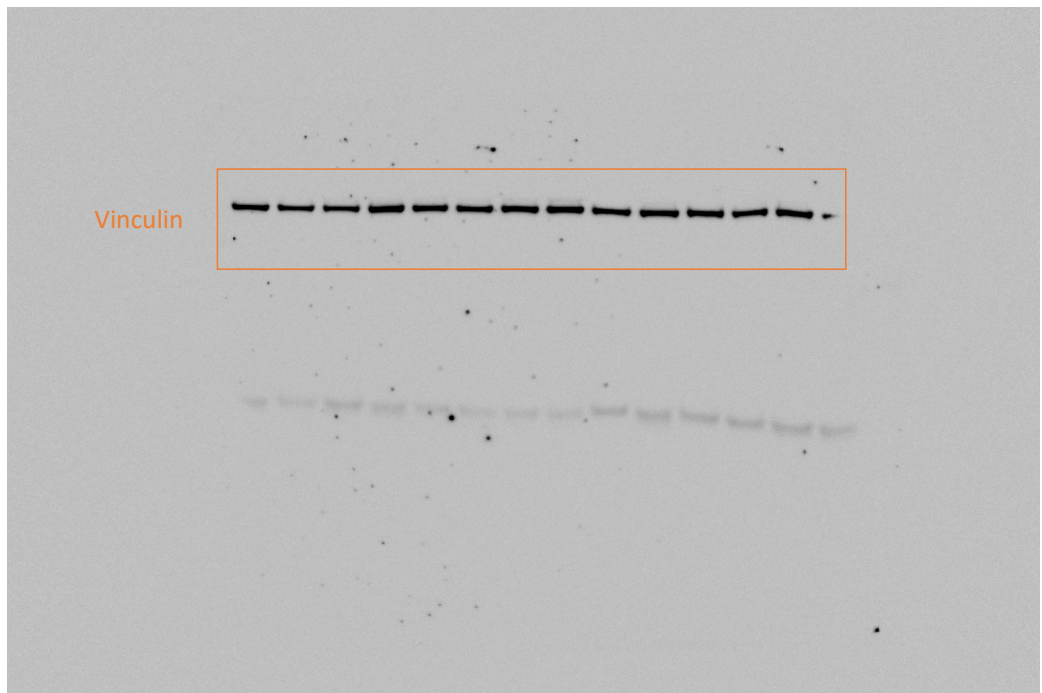

g)

Figure 3C

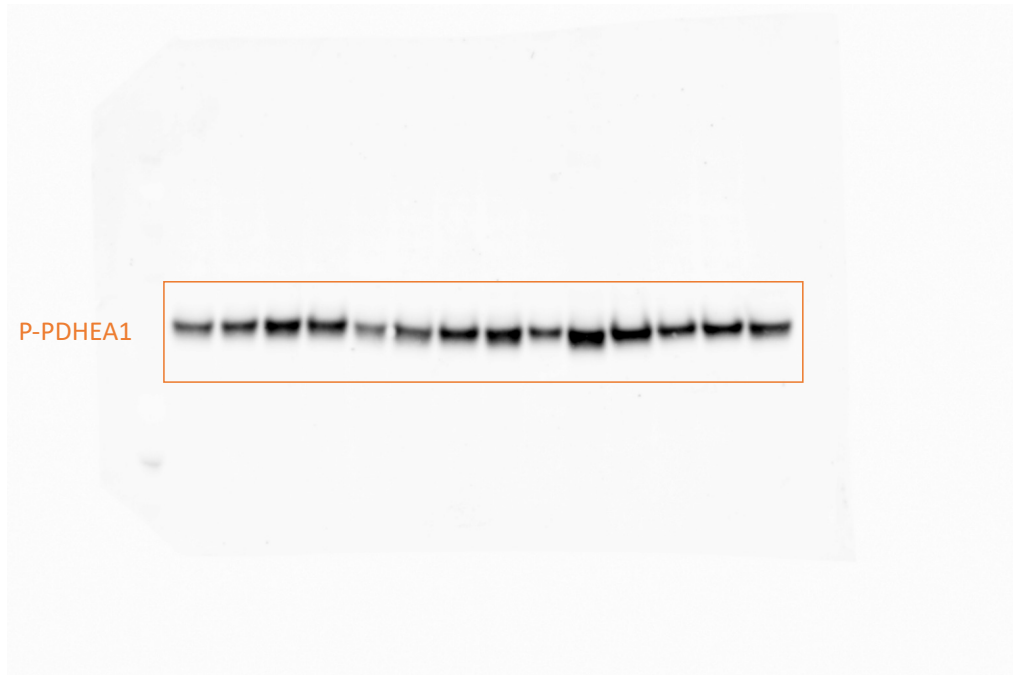

h)

Figure 3C

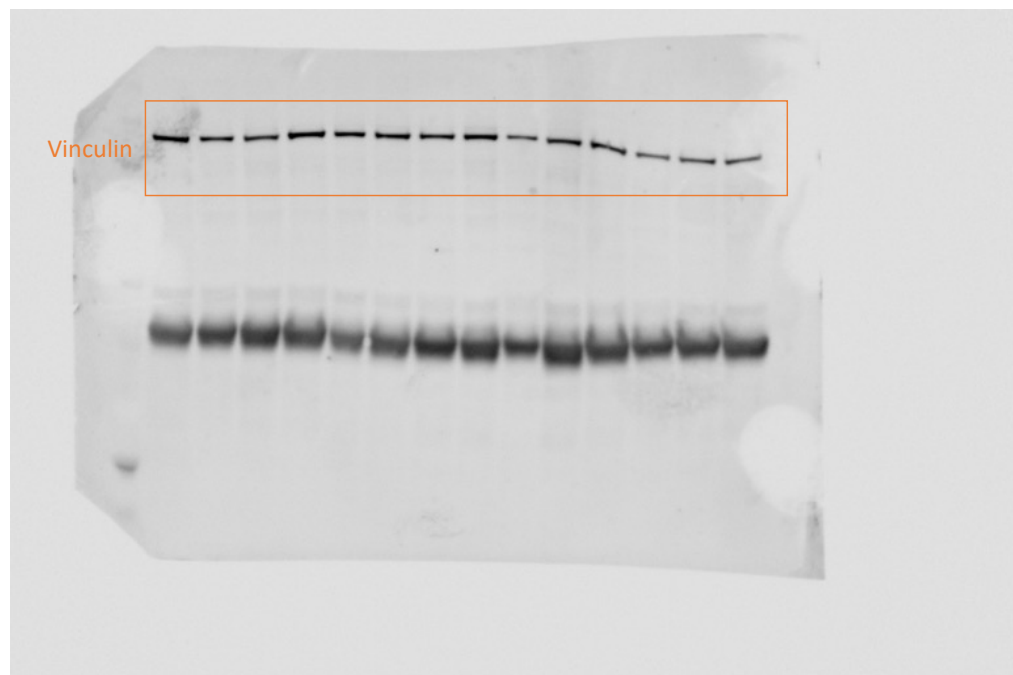



i)

Figure 3C

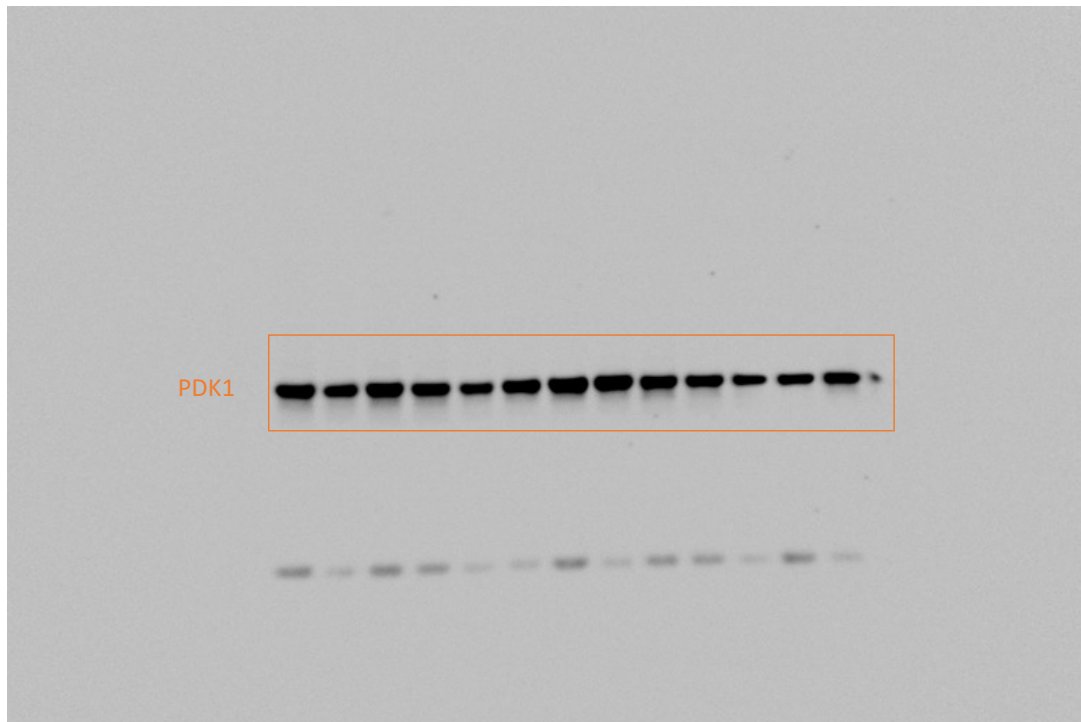

j)

Figure 3C

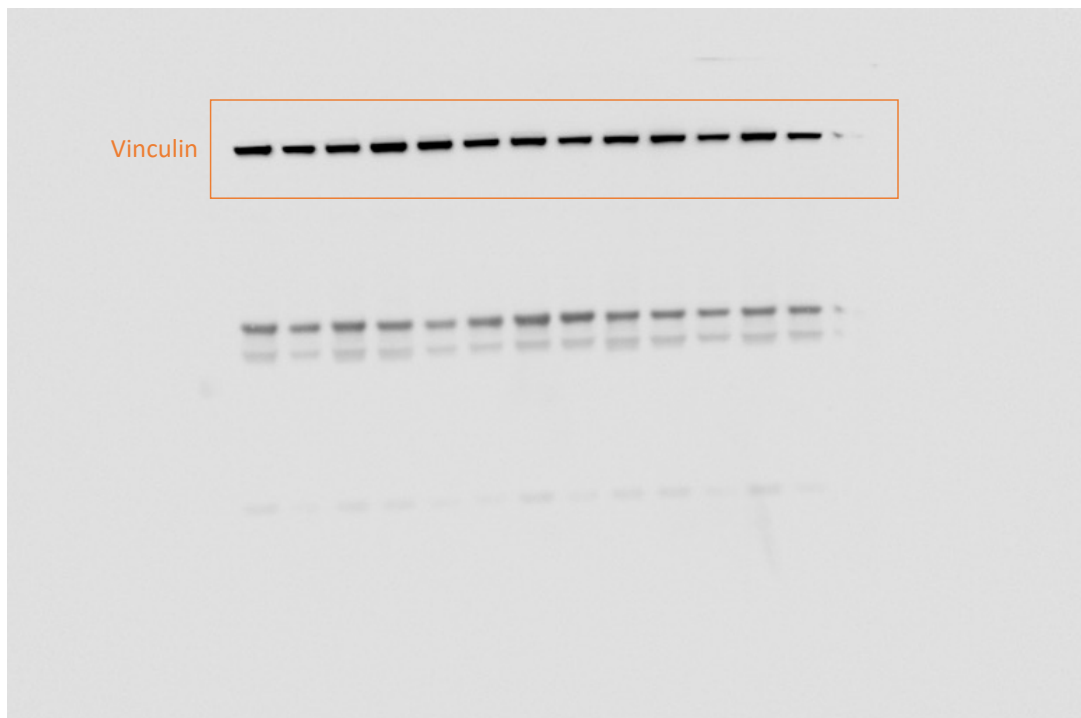

**Supplementary Fig. 1.** Full-length gels represented in main Figure 3A-C, a) HK2, b) G6PD, c) LDHA, d) Vinculin, e) PDHEA1, f) Vinculin, g) p-PDHEA1, h) Vinculin, i) PDK1 and j) Vinculin.

Full-length gels represented in Figure 4 in order of appearance.

a)

Figure 4

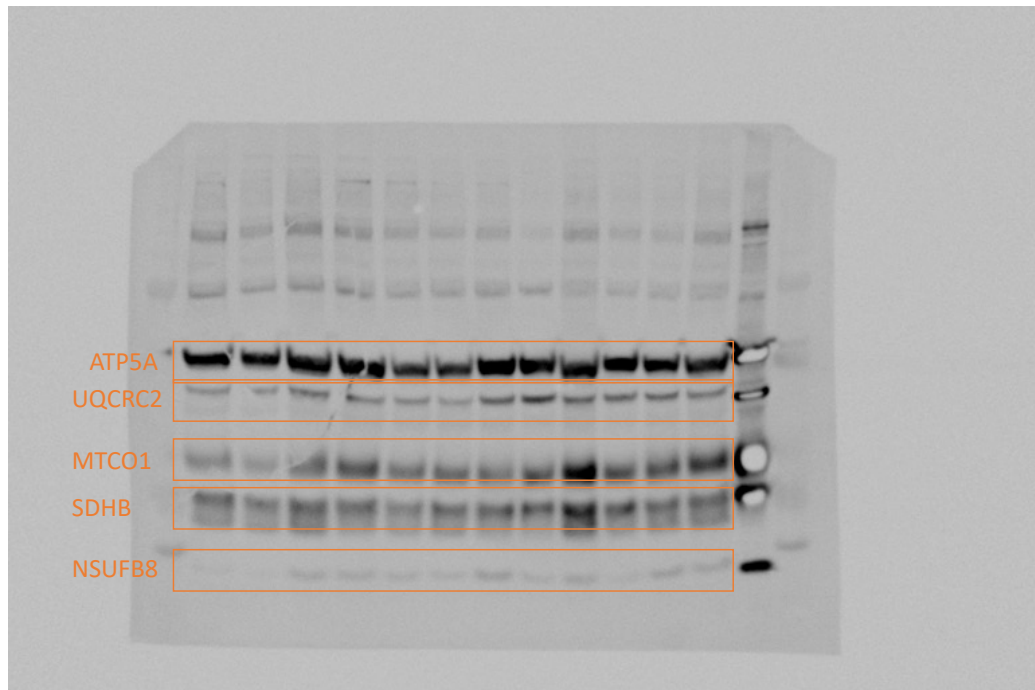

b)

Figure 4

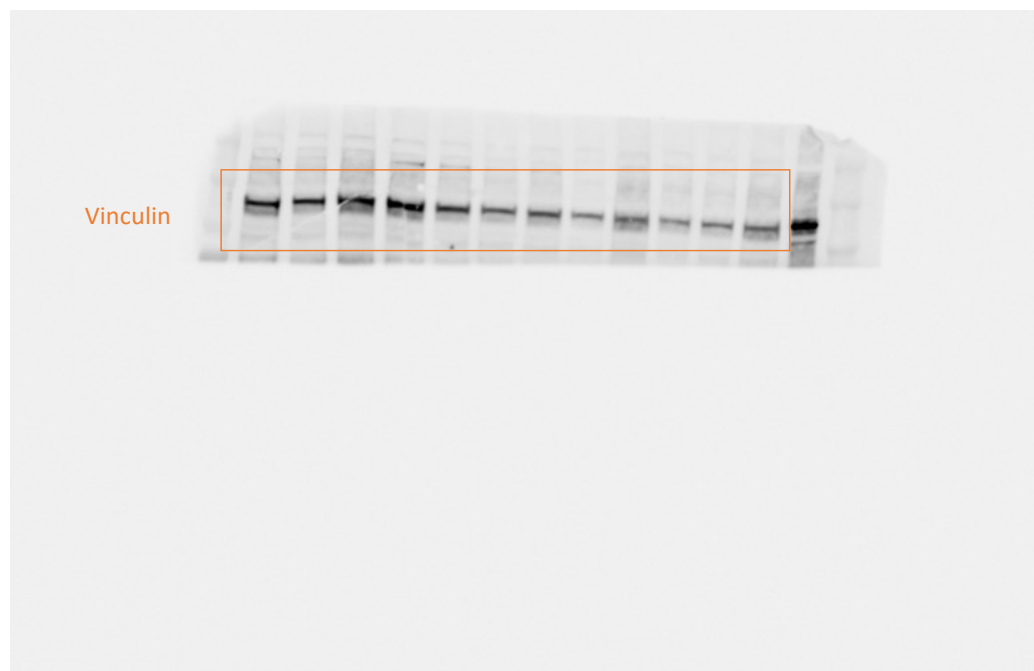

**Supplementary Fig. 2.** Full-length gels represented in main Figure 4, a) ATP5A, UQCRC2, MTCO1, SDHB and NSUFB8 oxidative phosphorylation associated proteins and b) Vinculin.
